# Supplementary material for: Global and regional levels and trends of child and adolescent morbidity from 2000 to 2016: an analysis of years lost due to disability (YLDs)
Source: HighWire-hosted journal article supplement (doi:10.1136/bmjgh-2021-004996), 2021-03-01
Supplement: bmjgh-2021-004996supp003_data_supplement.pdf [file bmjgh-2021-004996supp003_data_supplement.pdf]

**Appendix Table 3.** Global YLD rates (per 1,000 population) due to 18 broad cause groups for males and females, by age, 2000 and 2016, and percent decrease over time. Causes are sorted by YLD rates in 2016. Causes with a YLD rate of less than 0.5 per 1,000 population are not shown.

| Age                                 | Cause                                                                                     | YLD rate (UI),<br>2000   | YLD rate (UI),<br>2016 | Rank<br>2016 | % decrease<br>(UI) |
|-------------------------------------|-------------------------------------------------------------------------------------------|--------------------------|------------------------|--------------|--------------------|
| <b>0-27 days,<br/>Males</b>         | Nutritional deficiencies                                                                  | 12 (8 to 17)             | 11 (7 to 17)           | 1            | 1 (-39 to 26)      |
|                                     | Neonatal conditions                                                                       | 8 (6 to 10)              | 7 (5 to 9)             | 2            | 13 (-8 to 30)      |
|                                     | Infectious and parasitic diseases                                                         | 5 (3 to 6)               | 4 (3 to 5)             | 3            | 25 (4 to 40)*      |
|                                     | Congenital anomalies                                                                      | 3 (2 to 4)               | 3 (2 to 4)             | 4            | 6 (-17 to 26)      |
|                                     | Respiratory infections                                                                    | 2 (1 to 2)               | 1 (1 to 2)             | 5            | 11 (-23 to 38)     |
|                                     | Mental and substance use disorders                                                        | 1 (1 to 2)               | 1 (1 to 2)             | 6            | 9 (-27 to 32)      |
|                                     | Diabetes mellitus, and endocrine, blood, immune disorders                                 | 1 (1 to 2)               | 1 (1 to 1)             | 7            | 17 (-12 to 40)     |
|                                     | Sense organ diseases                                                                      | 1 (1 to 1)               | 1 (0 to 1)             | 8            | 14 (-17 to 36)     |
| <b>28 days-11<br/>months, Males</b> | Nutritional deficiencies                                                                  | 19 (13 to 27)            | 18 (12 to 25)          | 1            | 5 (-26 to 29)      |
|                                     | Infectious and parasitic diseases                                                         | 9 (6 to 12)              | 7 (5 to 10)            | 2            | 20 (-2 to 37)      |
|                                     | Neonatal conditions                                                                       | 5 (4 to 6)               | 5 (3 to 6)             | 3            | 2 (-16 to 17)      |
|                                     | Congenital anomalies                                                                      | 3 (2 to 4)               | 3 (2 to 4)             | 4            | 6 (-19 to 25)      |
|                                     | Diabetes mellitus, and endocrine, blood, immune disorders                                 | 3 (2 to 4)               | 2 (2 to 4)             | 5            | 9 (-26 to 34)      |
|                                     | Skin diseases                                                                             | 2 (1 to 3)               | 2 (1 to 3)             | 6            | 7 (-40 to 35)      |
|                                     | Respiratory infections                                                                    | 2 (1 to 3)               | 2 (1 to 3)             | 7            | 8 (-26 to 33)      |
|                                     | Unintentional injuries                                                                    | 2 (1 to 2)               | 1 (1 to 2)             | 8            | 20 (-4 to 39)      |
|                                     | Mental and substance use disorders                                                        | 2 (1 to 2)               | 1 (1 to 2)             | 9            | 8 (-24 to 34)      |
|                                     | Sense organ diseases                                                                      | 1 (1 to 2)               | 1 (1 to 1)             | 10           | 13 (-18 to 33)     |
|                                     | Neurological conditions                                                                   | 1 (0 to 1)               | 1 (0 to 1)             | 11           | 3 (-48 to 32)      |
| <b>1-4 years, Males</b>             | Nutritional deficiencies                                                                  | 14 (10 to 20)            | 14 (10 to 20)          | 1            | -1 (-34 to 24)     |
|                                     | Infectious and parasitic diseases                                                         | 7 (5 to 9)               | 6 (4 to 8)             | 2            | 16 (-6 to 32)      |
|                                     | Skin diseases                                                                             | 3 (2 to 5)               | 3 (2 to 5)             | 3            | 4 (-30 to 32)      |
|                                     | Neonatal conditions                                                                       | 3 (2 to 4)               | 3 (2 to 4)             | 4            | -8 (-29 to 10)     |
|                                     | Sense organ diseases                                                                      | 3 (2 to 4)               | 2 (2 to 3)             | 5            | 10 (-17 to 33)     |
|                                     | Respiratory infections                                                                    | 3 (2 to 4)               | 2 (1 to 4)             | 6            | 7 (-29 to 33)      |
|                                     | Congenital anomalies                                                                      | 2 (2 to 3)               | 2 (2 to 3)             | 7            | 3 (-21 to 24)      |
|                                     | Mental and substance use disorders                                                        | 2 (2 to 3)               | 2 (1 to 3)             | 8            | 6 (-26 to 30)      |
|                                     | Diabetes mellitus, and endocrine, blood, immune disorders                                 | 2 (1 to 4)               | 2 (1 to 4)             | 9            | 6 (-92 to 50)      |
|                                     | Neurological conditions                                                                   | 1 (1 to 2)               | 1 (1 to 2)             | 10           | -4 (-51 to 28)     |
|                                     | Unintentional injuries                                                                    | 1 (1 to 2)               | 1 (1 to 2)             | 11           | 6 (-24 to 28)      |
|                                     | Respiratory diseases                                                                      | 1 (1 to 2)               | 1 (1 to 2)             | 12           | 0 (-48 to 36)      |
|                                     | Digestive diseases, Genitourinary diseases, Oral conditions, Sudden infant death syndrome | 1 (1 to 1)               | 1 (1 to 1)             | 13           | 6 (-25 to 31)      |
|                                     | <b>5-9 years, Males</b>                                                                   | Nutritional deficiencies | 11 (7 to 15)           | 10 (6 to 15) | 1                  |
| Mental and substance use disorders  |                                                                                           | 8 (5 to 11)              | 7 (5 to 11)            | 2            | 2 (-28 to 25)      |
| Infectious and parasitic diseases   |                                                                                           | 5 (4 to 7)               | 5 (3 to 6)             | 3            | 14 (-11 to 32)     |
| Sense organ diseases                |                                                                                           | 4 (3 to 6)               | 4 (2 to 5)             | 4            | 7 (-25 to 31)      |
| Respiratory diseases                |                                                                                           | 3 (2 to 4)               | 3 (2 to 5)             | 5            | -5 (-48 to 29)     |

| Age                                                                                       | Cause                                                                                     | YLD rate (UI),<br>2000            | YLD rate (UI),<br>2016 | Rank<br>2016   | % decrease<br>(UI) |
|-------------------------------------------------------------------------------------------|-------------------------------------------------------------------------------------------|-----------------------------------|------------------------|----------------|--------------------|
| 5-9 years, Males                                                                          | Skin diseases                                                                             | 3 (2 to 4)                        | 3 (2 to 4)             | 6              | 2 (-46 to 31)      |
|                                                                                           | Neonatal conditions                                                                       | 2 (1 to 3)                        | 2 (2 to 3)             | 7              | -17 (-43 to 3)     |
|                                                                                           | Respiratory infections                                                                    | 2 (1 to 3)                        | 2 (1 to 3)             | 8              | 4 (-34 to 33)      |
|                                                                                           | Neurological conditions                                                                   | 2 (1 to 3)                        | 2 (1 to 3)             | 9              | -4 (-40 to 24)     |
|                                                                                           | Diabetes mellitus, and endocrine, blood, immune disorders                                 | 2 (1 to 4)                        | 2 (1 to 3)             | 10             | 11 (-39 to 47)     |
|                                                                                           | Congenital anomalies                                                                      | 2 (1 to 3)                        | 2 (1 to 3)             | 11             | 3 (-24 to 24)      |
|                                                                                           | Unintentional injuries                                                                    | 2 (1 to 3)                        | 2 (1 to 3)             | 12             | 3 (-22 to 24)      |
|                                                                                           | Digestive diseases, Genitourinary diseases, Oral conditions, Sudden infant death syndrome | 1 (1 to 2)                        | 1 (1 to 2)             | 13             | 7 (-27 to 30)      |
|                                                                                           | Mental and substance use disorders                                                        | 15 (11 to 22)                     | 15 (11 to 22)          | 1              | 0 (-33 to 23)      |
|                                                                                           | Nutritional deficiencies                                                                  | 6 (4 to 8)                        | 5 (3 to 8)             | 2              | 4 (-27 to 32)      |
|                                                                                           | Sense organ diseases                                                                      | 5 (3 to 7)                        | 4 (3 to 6)             | 3              | 6 (-27 to 29)      |
|                                                                                           | Neurological conditions                                                                   | 4 (3 to 6)                        | 4 (3 to 6)             | 4              | -2 (-39 to 22)     |
|                                                                                           | 10-14 years, Males                                                                        | Infectious and parasitic diseases | 4 (3 to 6)             | 4 (3 to 5)     | 5                  |
| Skin diseases                                                                             |                                                                                           | 3 (2 to 5)                        | 3 (2 to 5)             | 6              | 0 (-37 to 30)      |
| Unintentional injuries                                                                    |                                                                                           | 3 (2 to 4)                        | 3 (2 to 4)             | 7              | 2 (-23 to 22)      |
| Respiratory diseases                                                                      |                                                                                           | 3 (2 to 3)                        | 3 (2 to 4)             | 8              | -7 (-39 to 18)     |
| Neonatal conditions                                                                       |                                                                                           | 2 (1 to 2)                        | 2 (2 to 3)             | 9              | -21 (-49 to 0)*    |
| Congenital anomalies                                                                      |                                                                                           | 2 (1 to 3)                        | 2 (1 to 2)             | 10             | 2 (-26 to 21)      |
| Respiratory infections                                                                    |                                                                                           | 2 (1 to 3)                        | 2 (1 to 3)             | 11             | 4 (-36 to 33)      |
| Diabetes mellitus, and endocrine, blood, immune disorders                                 |                                                                                           | 2 (1 to 2)                        | 2 (1 to 2)             | 12             | -3 (-49 to 31)     |
| Musculoskeletal diseases                                                                  |                                                                                           | 1 (1 to 2)                        | 1 (1 to 2)             | 13             | 5 (-25 to 30)      |
| Digestive diseases, Genitourinary diseases, Oral conditions, Sudden infant death syndrome |                                                                                           | 1 (1 to 2)                        | 1 (1 to 1)             | 14             | 4 (-29 to 29)      |
| Mental and substance use disorders                                                        |                                                                                           | 23 (16 to 31)                     | 22 (16 to 30)          | 1              | 2 (-28 to 22)      |
| Neurological conditions                                                                   |                                                                                           | 5 (3 to 7)                        | 5 (3 to 7)             | 2              | 0 (-35 to 27)      |
| 15-19 years, Males                                                                        |                                                                                           | Sense organ diseases              | 5 (3 to 7)             | 5 (3 to 7)     | 3                  |
|                                                                                           | Skin diseases                                                                             | 4 (3 to 6)                        | 4 (3 to 6)             | 4              | -1 (-38 to 25)     |
|                                                                                           | Infectious and parasitic diseases                                                         | 5 (3 to 6)                        | 4 (3 to 5)             | 5              | 13 (-8 to 29)      |
|                                                                                           | Musculoskeletal diseases                                                                  | 4 (3 to 6)                        | 4 (3 to 6)             | 6              | 7 (-24 to 30)      |
|                                                                                           | Unintentional injuries                                                                    | 4 (3 to 5)                        | 4 (3 to 5)             | 7              | 3 (-22 to 22)      |
|                                                                                           | Nutritional deficiencies                                                                  | 3 (2 to 5)                        | 3 (2 to 4)             | 8              | 10 (-26 to 39)     |
|                                                                                           | Neonatal conditions                                                                       | 2 (1 to 2)                        | 2 (2 to 3)             | 9              | -22 (-47 to 0)     |
|                                                                                           | Respiratory diseases                                                                      | 2 (1 to 3)                        | 2 (1 to 3)             | 10             | -1 (-31 to 21)     |
|                                                                                           | Congenital anomalies                                                                      | 2 (1 to 2)                        | 2 (1 to 2)             | 11             | 3 (-25 to 23)      |
|                                                                                           | Digestive diseases, Genitourinary diseases, Oral conditions, Sudden infant death syndrome | 1 (1 to 2)                        | 2 (1 to 2)             | 12             | -1 (-33 to 27)     |
|                                                                                           | Respiratory infections                                                                    | 2 (1 to 2)                        | 1 (1 to 2)             | 13             | 5 (-30 to 33)      |
|                                                                                           | Diabetes mellitus, and endocrine, blood, immune disorders                                 | 1 (1 to 2)                        | 1 (1 to 2)             | 14             | -15 (-65 to 21)    |
|                                                                                           | Cardiovascular diseases                                                                   | 1 (1 to 1)                        | 1 (1 to 1)             | 15             | -7 (-36 to 16)     |
| Intentional injuries                                                                      | 1 (1 to 1)                                                                                | 1 (0 to 1)                        | 16                     | 28 (10 to 41)* |                    |

| Age                                       | Cause                                                                                     | YLD rate (UI),<br>2000 | YLD rate (UI),<br>2016 | Rank<br>2016 | % decrease<br>(UI) |
|-------------------------------------------|-------------------------------------------------------------------------------------------|------------------------|------------------------|--------------|--------------------|
| <b>0-27 days,<br/>Females</b>             | Nutritional deficiencies                                                                  | 11 (7 to 16)           | 11 (7 to 16)           | 1            | -2 (-38 to 26)     |
|                                           | Neonatal conditions                                                                       | 9 (7 to 12)            | 8 (6 to 10)            | 2            | 13 (-8 to 30)      |
|                                           | Infectious and parasitic diseases                                                         | 5 (3 to 6)             | 4 (3 to 5)             | 3            | 24 (4 to 40)*      |
|                                           | Congenital anomalies                                                                      | 4 (3 to 5)             | 3 (2 to 4)             | 4            | 6 (-17 to 24)      |
|                                           | Respiratory infections                                                                    | 2 (1 to 2)             | 1 (1 to 2)             | 5            | 12 (-19 to 40)     |
|                                           | Diabetes mellitus, and endocrine, blood, immune disorders                                 | 1 (1 to 2)             | 1 (1 to 2)             | 6            | 9 (-25 to 33)      |
|                                           | Sense organ diseases                                                                      | 1 (1 to 1)             | 1 (0 to 1)             | 7            | 13 (-18 to 36)     |
| <b>28 days-11<br/>months,<br/>Females</b> | Nutritional deficiencies                                                                  | 18 (12 to 25)          | 17 (11 to 24)          | 1            | 6 (-29 to 32)      |
|                                           | Infectious and parasitic diseases                                                         | 9 (7 to 12)            | 7 (5 to 10)            | 2            | 20 (-1 to 35)      |
|                                           | Neonatal conditions                                                                       | 5 (4 to 6)             | 5 (4 to 6)             | 3            | 3 (-15 to 18)      |
|                                           | Congenital anomalies                                                                      | 3 (2 to 4)             | 3 (2 to 4)             | 4            | 5 (-16 to 25)      |
|                                           | Diabetes mellitus, and endocrine, blood, immune disorders                                 | 3 (2 to 4)             | 2 (2 to 4)             | 5            | 3 (-36 to 32)      |
|                                           | Skin diseases                                                                             | 2 (1 to 3)             | 2 (1 to 3)             | 6            | 6 (-38 to 31)      |
|                                           | Respiratory infections                                                                    | 2 (1 to 3)             | 2 (1 to 3)             | 7            | 7 (-27 to 34)      |
|                                           | Unintentional injuries                                                                    | 2 (1 to 2)             | 1 (1 to 2)             | 8            | 17 (-7 to 37)      |
|                                           | Sense organ diseases                                                                      | 1 (1 to 2)             | 1 (1 to 1)             | 9            | 12 (-19 to 36)     |
|                                           | Mental and substance use disorders                                                        | 1 (0 to 1)             | 1 (0 to 1)             | 10           | 9 (-34 to 37)      |
|                                           | Neurological conditions                                                                   | 1 (0 to 1)             | 1 (0 to 1)             | 11           | 0 (-54 to 30)      |
| <b>1-4 years,<br/>Females</b>             | Nutritional deficiencies                                                                  | 14 (9 to 19)           | 14 (9 to 19)           | 1            | 1 (-31 to 28)      |
|                                           | Infectious and parasitic diseases                                                         | 7 (5 to 9)             | 6 (4 to 8)             | 2            | 16 (-5 to 33)      |
|                                           | Skin diseases                                                                             | 4 (2 to 6)             | 4 (2 to 5)             | 3            | 4 (-31 to 31)      |
|                                           | Neonatal conditions                                                                       | 3 (2 to 4)             | 3 (2 to 4)             | 4            | -11 (-33 to 9)     |
|                                           | Congenital anomalies                                                                      | 3 (2 to 3)             | 3 (2 to 3)             | 5            | 3 (-22 to 23)      |
|                                           | Sense organ diseases                                                                      | 3 (2 to 4)             | 2 (2 to 3)             | 6            | 10 (-22 to 33)     |
|                                           | Respiratory infections                                                                    | 3 (2 to 4)             | 2 (1 to 3)             | 7            | 7 (-31 to 35)      |
|                                           | Diabetes mellitus, and endocrine, blood, immune disorders                                 | 2 (1 to 4)             | 2 (1 to 3)             | 8            | 6 (-77 to 51)      |
|                                           | Respiratory diseases                                                                      | 1 (1 to 2)             | 1 (1 to 2)             | 9            | -4 (-51 to 29)     |
|                                           | Neurological conditions                                                                   | 1 (1 to 2)             | 1 (1 to 2)             | 10           | -5 (-50 to 26)     |
|                                           | Unintentional injuries                                                                    | 1 (1 to 2)             | 1 (1 to 2)             | 11           | 6 (-24 to 27)      |
|                                           | Mental and substance use disorders                                                        | 1 (1 to 2)             | 1 (1 to 2)             | 12           | 5 (-36 to 33)      |
|                                           | Digestive diseases, Genitourinary diseases, Oral conditions, Sudden infant death syndrome | 1 (0 to 1)             | 1 (0 to 1)             | 13           | 12 (-19 to 34)     |
|                                           | Nutritional deficiencies                                                                  | 10 (7 to 15)           | 9 (6 to 13)            | 1            | 10 (-21 to 35)     |
|                                           | Mental and substance use disorders                                                        | 5 (4 to 7)             | 5 (3 to 7)             | 2            | 1 (-28 to 25)      |
|                                           | Infectious and parasitic diseases                                                         | 5 (4 to 7)             | 4 (3 to 6)             | 3            | 12 (-13 to 32)     |
|                                           | <b>5-9 years,<br/>Females</b>                                                             | Sense organ diseases   | 4 (3 to 6)             | 4 (2 to 5)   | 4                  |
| Respiratory diseases                      |                                                                                           | 3 (2 to 5)             | 3 (2 to 5)             | 5            | -8 (-49 to 26)     |
| Skin diseases                             |                                                                                           | 3 (2 to 5)             | 3 (2 to 5)             | 6            | 1 (-43 to 31)      |
| Neurological conditions                   |                                                                                           | 2 (1 to 3)             | 2 (2 to 3)             | 7            | -3 (-40 to 23)     |

| Age                             | Cause                                                                                     | YLD rate (UI),<br>2000 | YLD rate (UI),<br>2016 | Rank<br>2016   | % decrease<br>(UI) |
|---------------------------------|-------------------------------------------------------------------------------------------|------------------------|------------------------|----------------|--------------------|
| <b>5-9 years,<br/>Females</b>   | Neonatal conditions                                                                       | 2 (1 to 2)             | 2 (2 to 3)             | 8              | -21 (-46 to 1)     |
|                                 | Respiratory infections                                                                    | 2 (1 to 3)             | 2 (1 to 3)             | 9              | 4 (-35 to 32)      |
|                                 | Congenital anomalies                                                                      | 2 (2 to 3)             | 2 (2 to 3)             | 10             | 3 (-24 to 23)      |
|                                 | Diabetes mellitus, and endocrine, blood, immune disorders                                 | 2 (1 to 3)             | 2 (1 to 3)             | 11             | 5 (-47 to 40)      |
|                                 | Unintentional injuries                                                                    | 2 (1 to 2)             | 2 (1 to 2)             | 12             | 3 (-22 to 23)      |
|                                 | Digestive diseases, Genitourinary diseases, Oral conditions, Sudden infant death syndrome | 1 (1 to 2)             | 1 (1 to 2)             | 13             | 7 (-27 to 30)      |
|                                 | Mental and substance use disorders                                                        | 14 (9 to 19)           | 14 (10 to 19)          | 1              | -1 (-33 to 22)     |
|                                 | Nutritional deficiencies                                                                  | 8 (5 to 11)            | 8 (5 to 11)            | 2              | 3 (-31 to 28)      |
|                                 | Neurological conditions                                                                   | 5 (4 to 8)             | 6 (4 to 8)             | 3              | -3 (-41 to 22)     |
|                                 | Sense organ diseases                                                                      | 4 (3 to 6)             | 4 (3 to 6)             | 4              | 5 (-27 to 28)      |
|                                 | Skin diseases                                                                             | 4 (2 to 6)             | 4 (3 to 6)             | 5              | -1 (-40 to 28)     |
| <b>10-14 years,<br/>Females</b> | Infectious and parasitic diseases                                                         | 4 (3 to 5)             | 3 (2 to 5)             | 6              | 10 (-13 to 28)     |
|                                 | Respiratory diseases                                                                      | 3 (2 to 4)             | 3 (2 to 4)             | 7              | -9 (-38 to 15)     |
|                                 | Unintentional injuries                                                                    | 2 (2 to 3)             | 2 (2 to 3)             | 8              | 2 (-22 to 22)      |
|                                 | Neonatal conditions                                                                       | 2 (1 to 2)             | 2 (2 to 3)             | 9              | -22 (-49 to 1)     |
|                                 | Congenital anomalies                                                                      | 2 (1 to 3)             | 2 (1 to 2)             | 10             | 3 (-23 to 23)      |
|                                 | Musculoskeletal diseases                                                                  | 2 (1 to 2)             | 2 (1 to 2)             | 11             | 6 (-28 to 29)      |
|                                 | Respiratory infections                                                                    | 2 (1 to 3)             | 2 (1 to 3)             | 12             | 4 (-33 to 33)      |
|                                 | Diabetes mellitus, and endocrine, blood, immune disorders                                 | 1 (1 to 2)             | 1 (1 to 2)             | 13             | 3 (-43 to 36)      |
|                                 | Digestive diseases, Genitourinary diseases, Oral conditions, Sudden infant death syndrome | 1 (1 to 2)             | 1 (1 to 2)             | 14             | 9 (-22 to 34)      |
|                                 | Mental and substance use disorders                                                        | 22 (16 to 29)          | 22 (15 to 29)          | 1              | 1 (-26 to 23)      |
|                                 | Neurological conditions                                                                   | 8 (5 to 11)            | 8 (5 to 11)            | 2              | 0 (-34 to 25)      |
| <b>15-19 years,<br/>Females</b> | Nutritional deficiencies                                                                  | 7 (5 to 10)            | 7 (5 to 10)            | 3              | 5 (-26 to 31)      |
|                                 | Musculoskeletal diseases                                                                  | 6 (4 to 8)             | 5 (3 to 7)             | 4              | 5 (-25 to 27)      |
|                                 | Skin diseases                                                                             | 5 (3 to 7)             | 5 (3 to 7)             | 5              | -1 (-43 to 27)     |
|                                 | Sense organ diseases                                                                      | 5 (3 to 7)             | 5 (3 to 7)             | 6              | 6 (-25 to 30)      |
|                                 | Infectious and parasitic diseases                                                         | 4 (3 to 6)             | 4 (3 to 5)             | 7              | 10 (-14 to 28)     |
|                                 | Digestive diseases, Genitourinary diseases, Oral conditions, Sudden infant death syndrome | 4 (3 to 6)             | 4 (3 to 6)             | 8              | 1 (-34 to 26)      |
|                                 | Unintentional injuries                                                                    | 3 (2 to 4)             | 3 (2 to 4)             | 9              | 3 (-19 to 22)      |
|                                 | Respiratory diseases                                                                      | 2 (2 to 3)             | 2 (2 to 3)             | 10             | -1 (-25 to 19)     |
|                                 | Neonatal conditions                                                                       | 2 (1 to 2)             | 2 (2 to 3)             | 11             | -22 (-48 to 1)     |
|                                 | Congenital anomalies                                                                      | 2 (1 to 2)             | 2 (1 to 2)             | 12             | 3 (-23 to 23)      |
|                                 | Diabetes mellitus, and endocrine, blood, immune disorders                                 | 2 (1 to 2)             | 2 (1 to 2)             | 13             | 0 (-42 to 30)      |
| Respiratory infections          | 2 (1 to 2)                                                                                | 1 (1 to 2)             | 14                     | 4 (-29 to 31)  |                    |
| Cardiovascular diseases         | 1 (1 to 1)                                                                                | 1 (1 to 1)             | 15                     | -8 (-40 to 16) |                    |
| Intentional injuries            | 1 (1 to 1)                                                                                | 1 (0 to 1)             | 16                     | 32 (11 to 50)* |                    |

\*significant decrease at 5% level
